# Supplementary material for: A grass-specific cellulose–xylan interaction dominates in sorghum secondary cell walls
Source: PubMed Central journal article supplement (PMC7695714; doi:10.1038/s41467-020-19837-z), 2020-11-27
Supplement: 41467_2020_19837_MOESM1_ESM.pdf [file 41467_2020_19837_MOESM1_ESM.pdf]

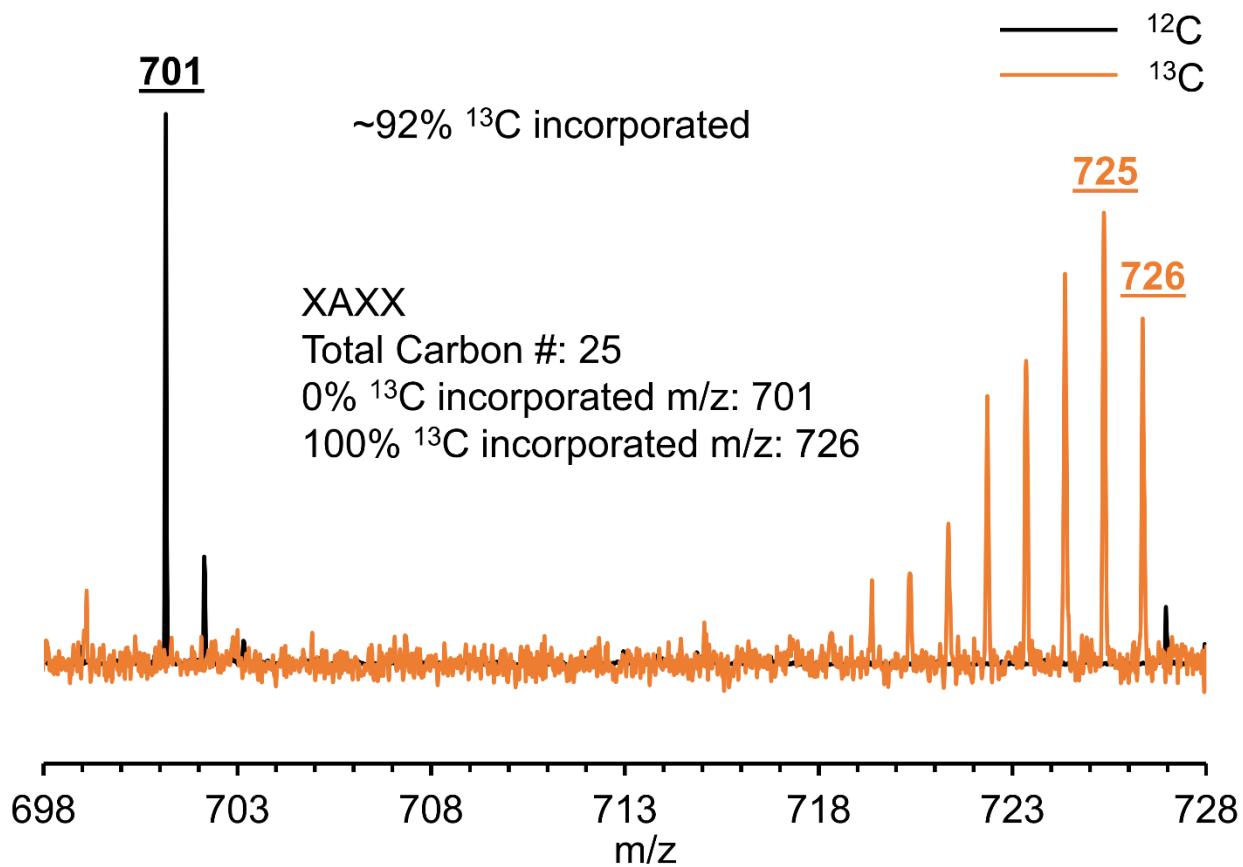

**Figure S1.** MALDI-TOF mass spectra of  $^{12}\text{C}$ - and  $^{13}\text{C}$ -oligosaccharides, XAXX, which were generated by digestion of alkali extracted xylan from sorghum secondary cell wall with GH11 xylanase. Source data are provided as a Source Data file.

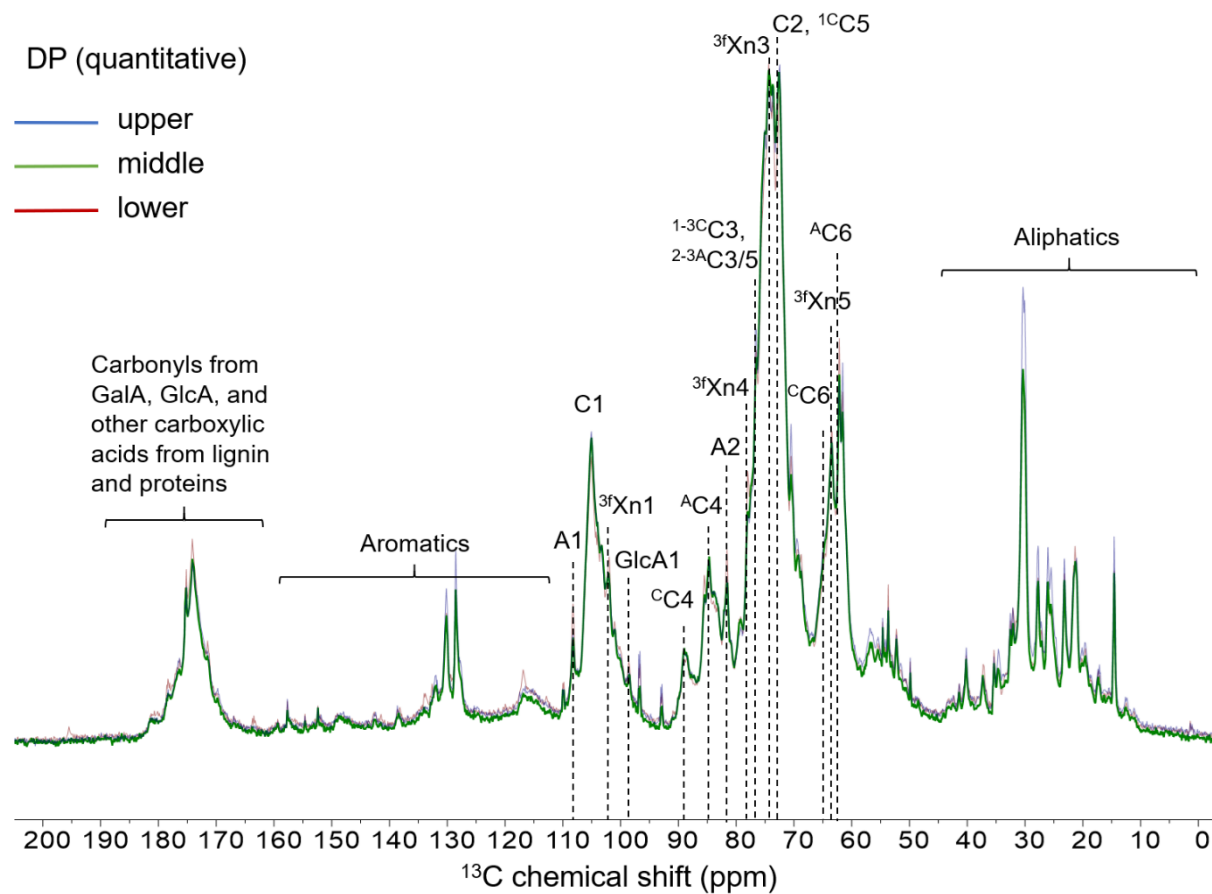

**Figure S2.** 1D  $^{13}\text{C}$  quantitative DP experiments on upper, middle and lower sorghum stem internode. A recycle delay of 30 s was used to guarantee quantitative analysis. No major compositional difference was observed between different parts of stem tissue from internodes.

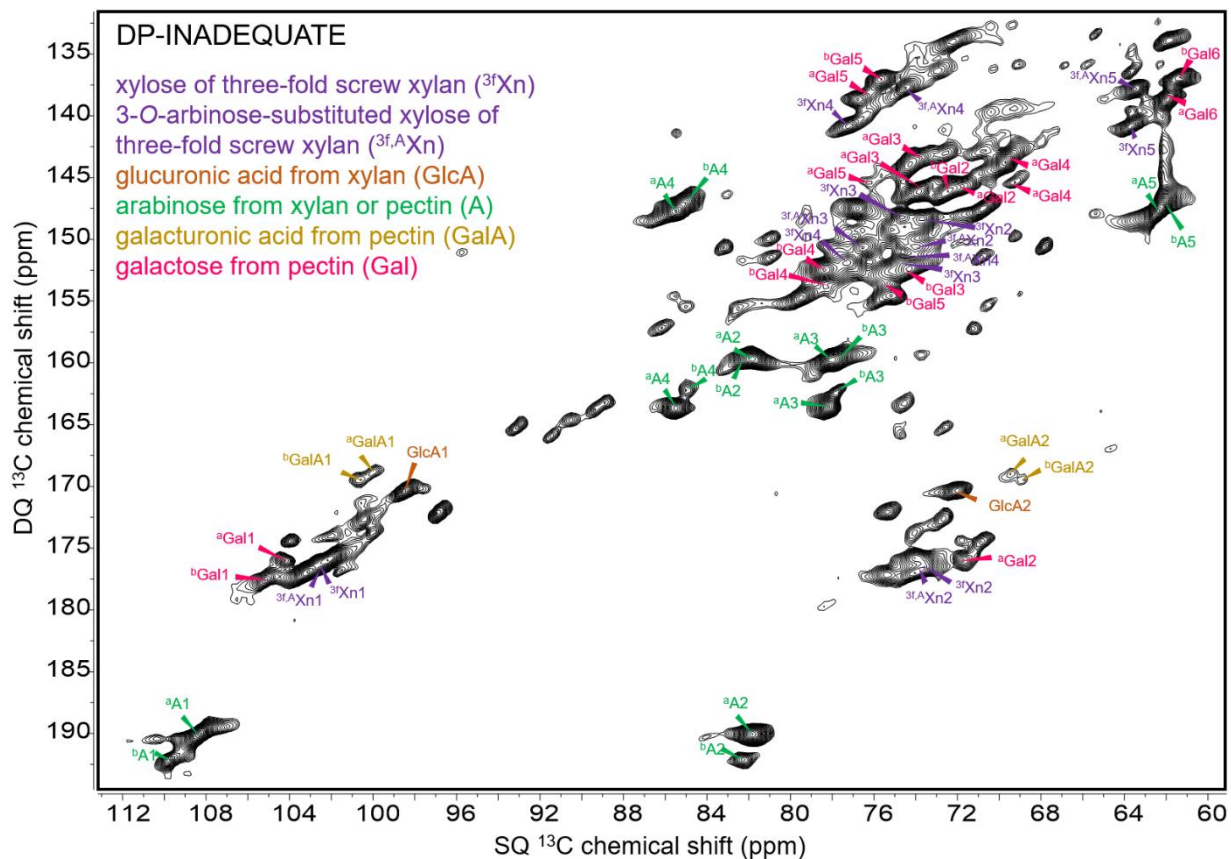

**Figure S3.** Mobile polysaccharides detected by refocused  $^{13}\text{C}$  DP-INADEQUATE experiments with recycle delay of 2 s in sorghum secondary cell walls.

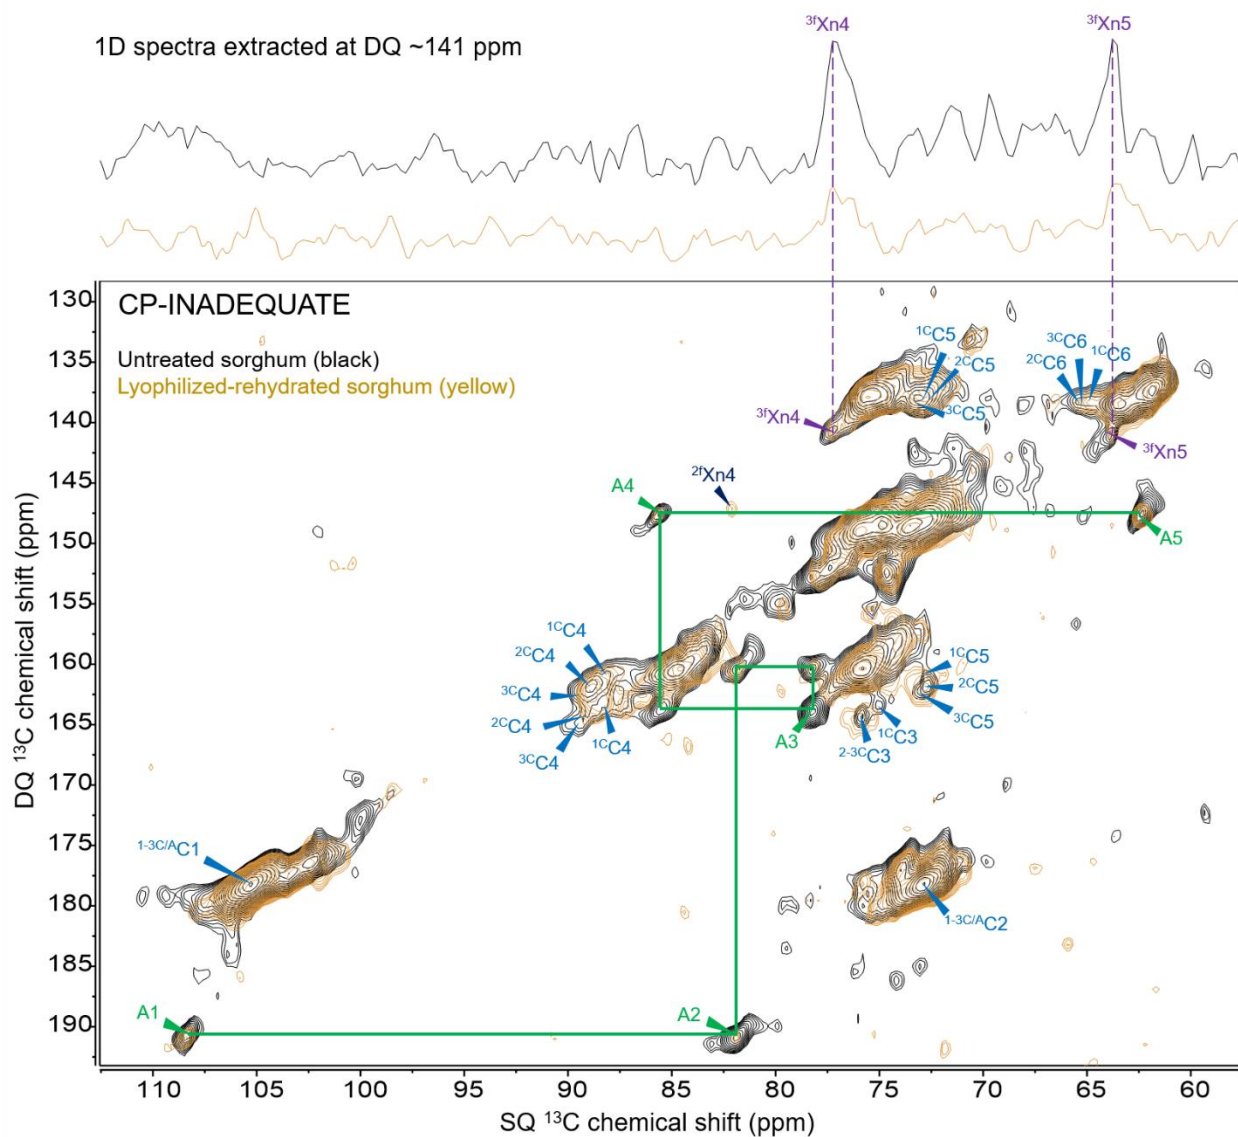

**Figure S4.** Spectral overlay of refocused  $^{13}\text{C}$  CP-INADEQUATE experiments on native untreated (black) and lyophilized-rehydrated (yellow) sorghum stem tissue. The intensities of arabinose signals (i.e., A1-A5) and xylose signals from three-fold screw xylan (e.g.,  $^{3f}\text{Xn4}$  and  $^{3f}\text{Xn5}$ ) in the lyophilized-rehydrated sample were significantly decreased compared to the untreated sample. Weak signals from xylosyl units of two-fold screw xylan (e.g.,  $^{2f}\text{Xn4}$ ) were detected and the intensities of glucose signals from cellulose were enhanced in the lyophilized-rehydrated sample.

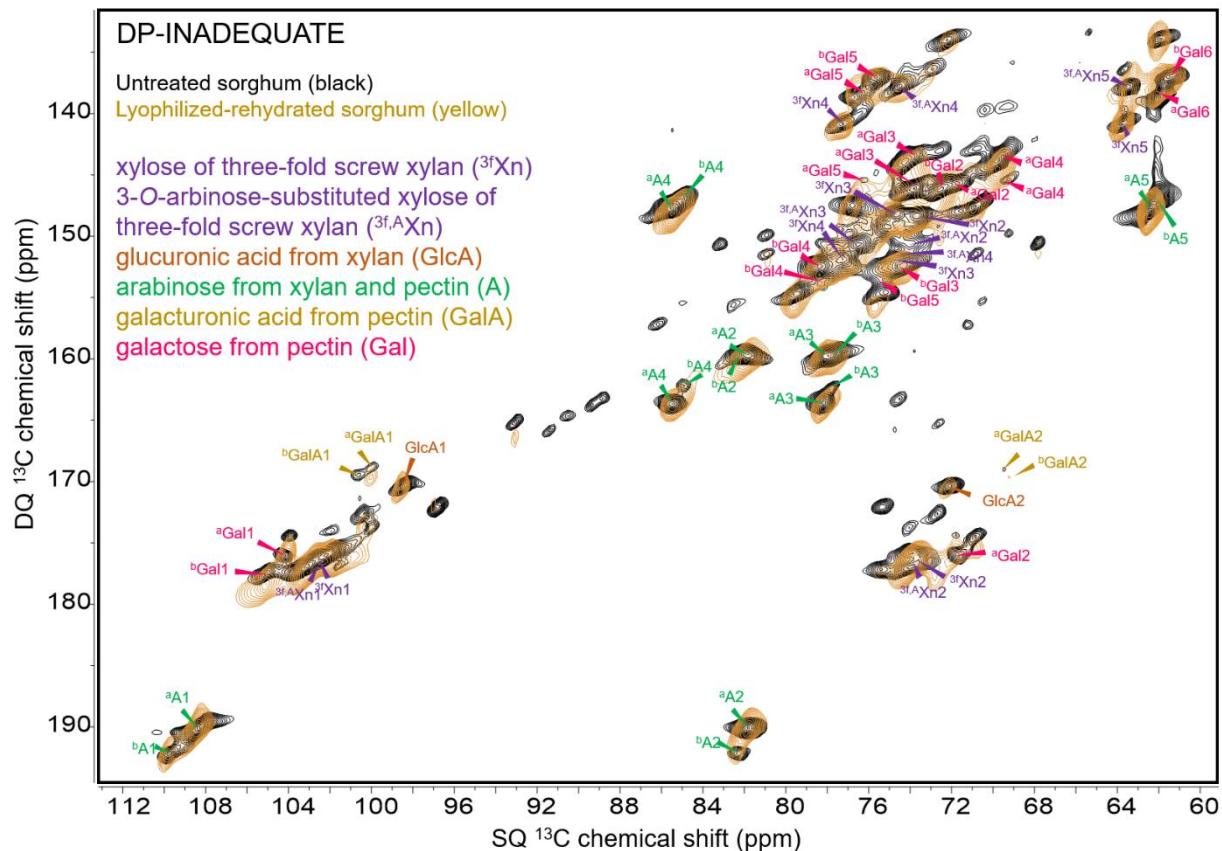

**Figure S5.** Spectral overlay of refocused  ${}^{13}C$  DP-INADEQUATE experiments on native untreated (black) and lyophilized-rehydrated (yellow) sorghum stem tissue. In contrast to the  ${}^{13}C$  DP-INADEQUATE experiments (Figure S4), the intensities of arabinose signals (i.e., A1-A5) and xylose signals from three-fold screw xylan (e.g.,  ${}^3fXn4$  and  ${}^3fXn5$ ) in the lyophilized-rehydrated sample were significantly increased compared to the untreated sample.

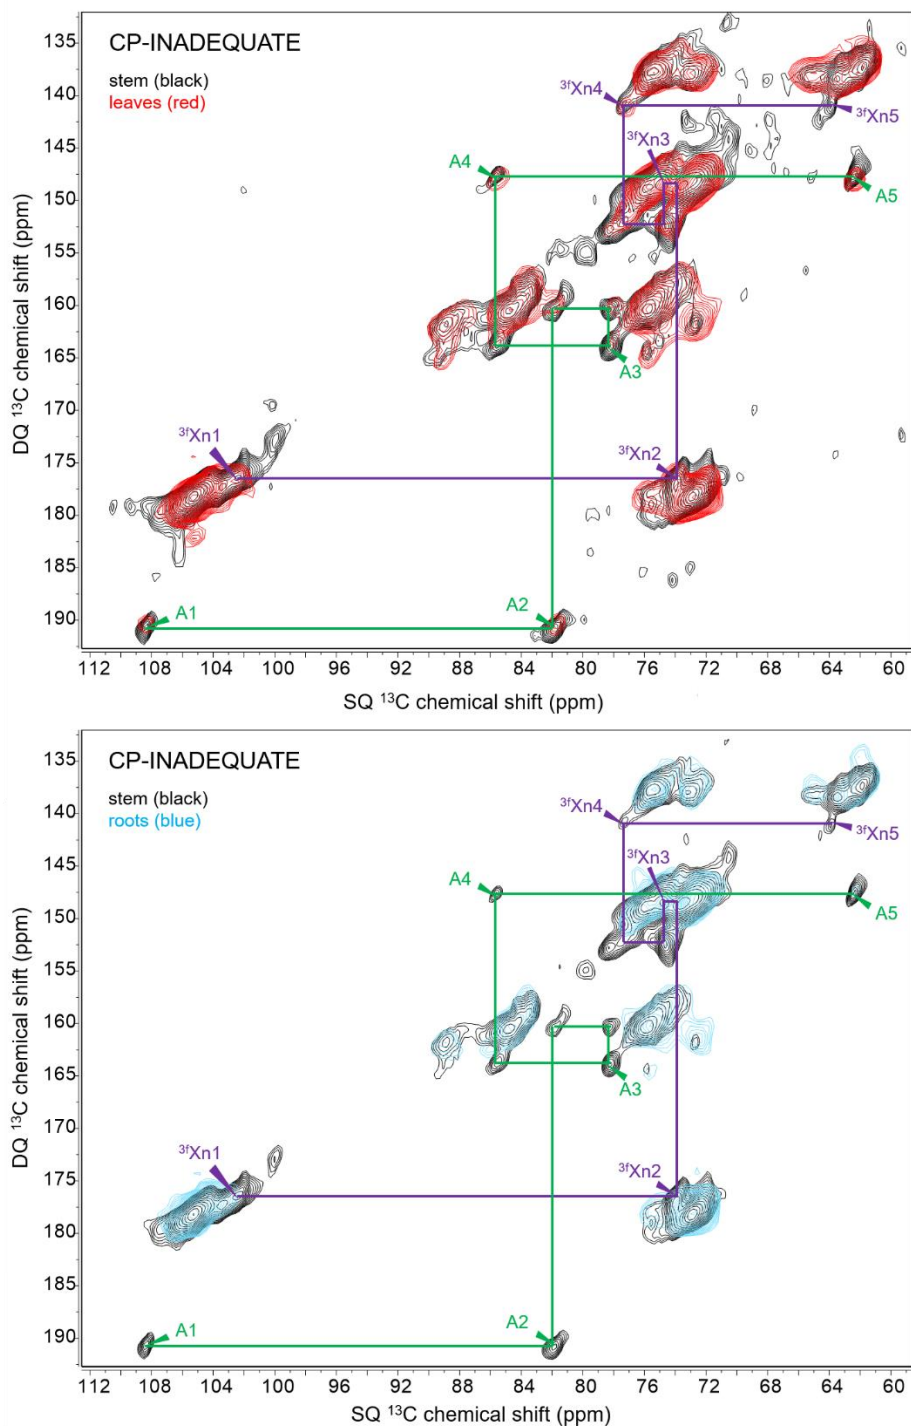

**Figure S6.** Spectral overlay of refocused  $^{13}\text{C}$  CP-INADEQUATE experiments to compare sorghum leaf tissue (top panel) and root tissue (bottom panel) with stem tissue. Both sorghum leaf and root tissue show a lack of signals from two-fold screw xylan, but enhanced signals from cellulose, as in the stem tissue. Sorghum root tissue also shows a lack of signals from arabinosyl and xylosyl units from immobile three-fold screw xylan.



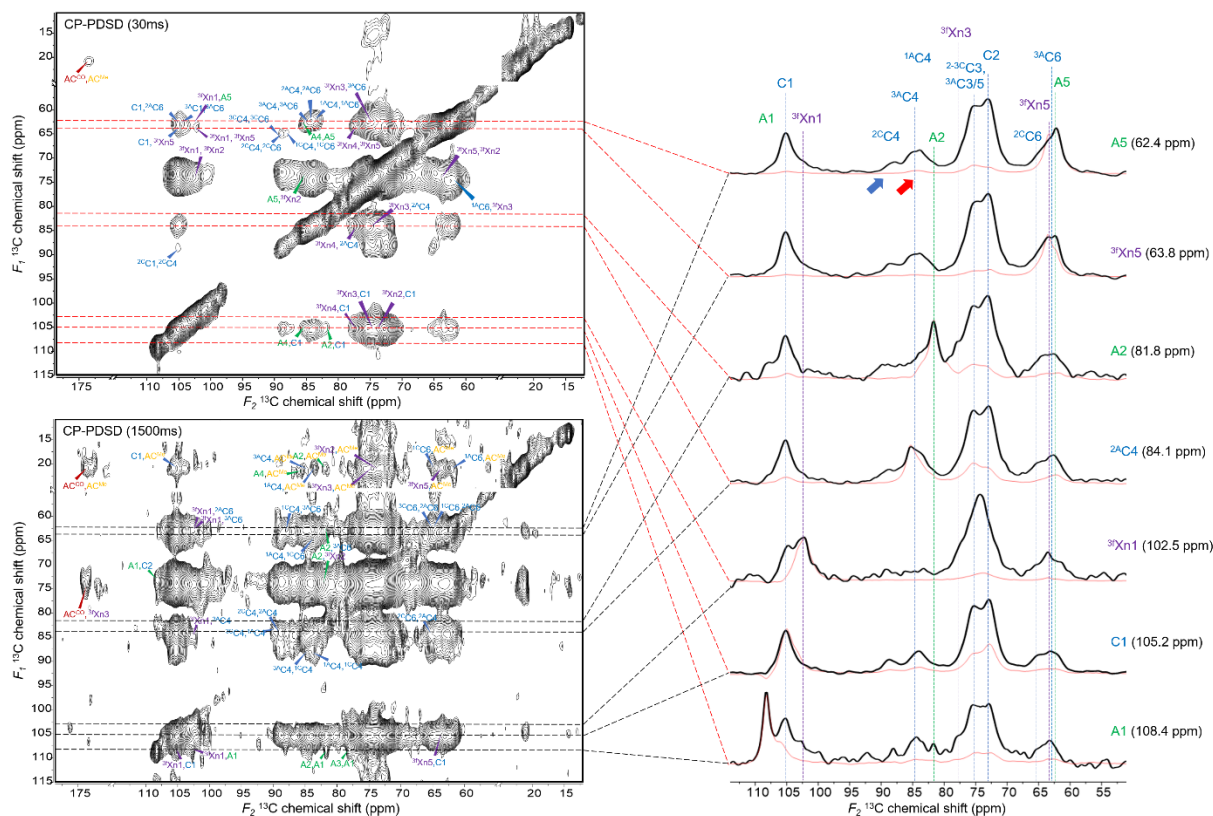

**Figure S8.** CP-PDS spectra with short (30 ms) and long (1500 ms) mixing times of sorghum secondary cell walls. 1D spectra were extracted from the  $F1$  planes of both CP-PDS spectra at chemical shifts, 108.4 ppm, 105.2 ppm, 102.5 ppm, 84.1 ppm, 81.8 ppm, 63.8 ppm and 62.4 ppm and demonstrated on the right panel. The blue and red arrows in the extracted 1D spectra point the chemical shift regions of C4s from crystalline and amorphous cellulose respectively, which are indicating that the moieties from xylan (A1,  $3^fXn1$ , A2,  $3^fXn5$ , and A5) interact with amorphous cellulose, but not with crystalline cellulose in close proximities.



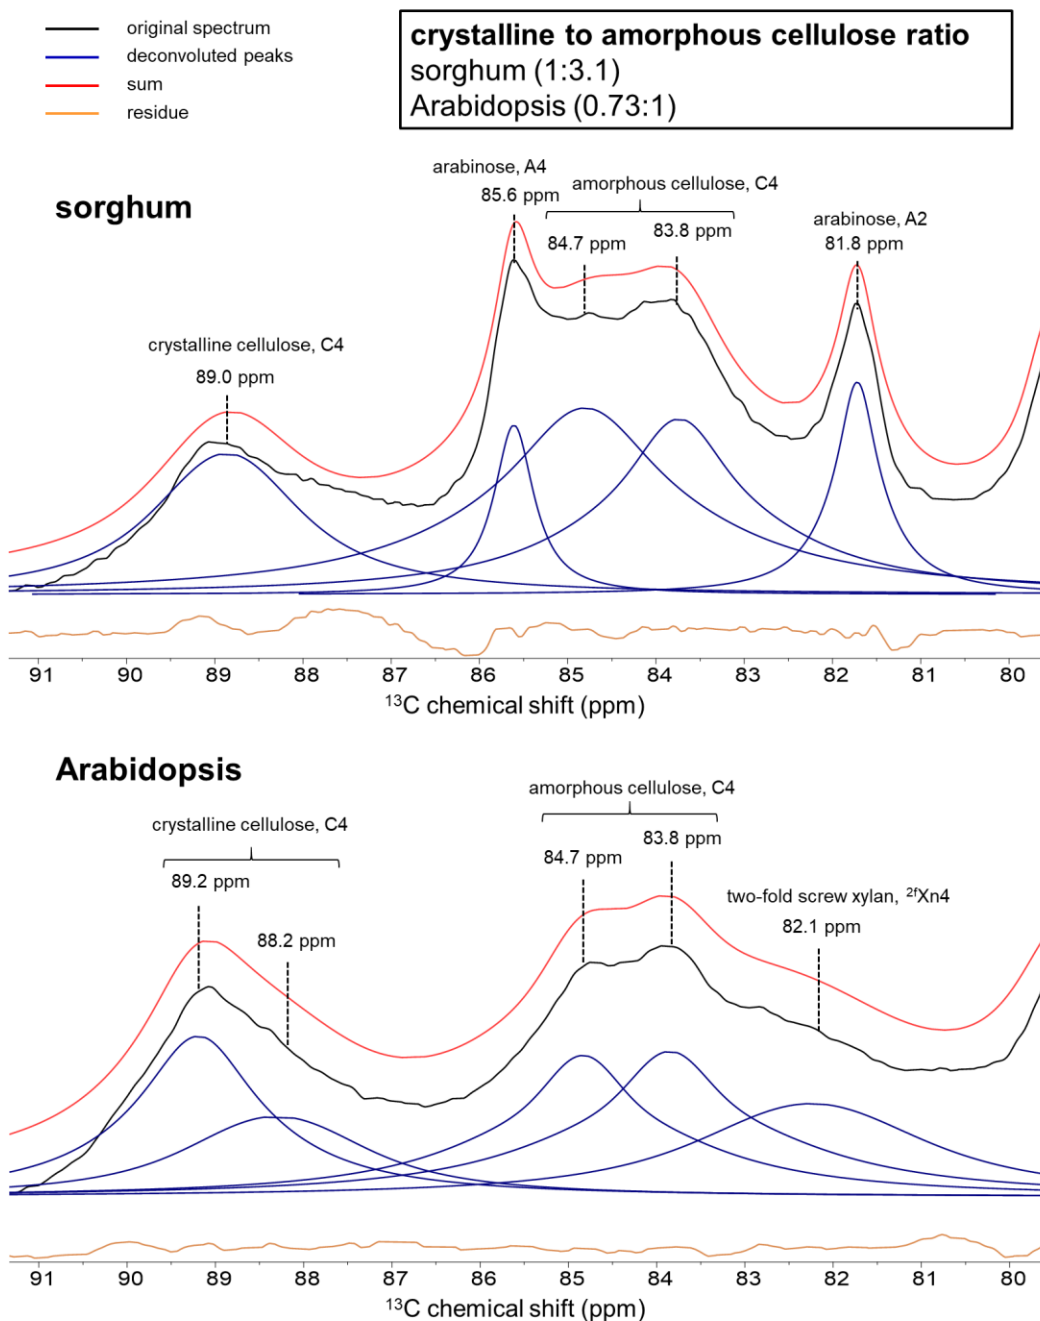

**Figure S9.** 1D  $^{13}\text{C}$  CP experiments on the stem tissue of sorghum and Arabidopsis (spectra were zoomed at cellulose C4 region, 90-80 ppm). Spectra were deconvoluted and integrated by a built-in Global Spectral Deconvolution (GSD) method in MestReNova NMR processing software (Version 14.1.0). The crystalline to amorphous cellulose ratio is determined as 1:3.1 for sorghum and 0.73:1 for Arabidopsis, which is consistent with CP-PDSD determined results.

**Table S1.** Monosaccharide composition of the non-cellulosic components of sorghum stem internode cell walls. N.D., not detected.

| <b>Non-cellulosic components, mol %</b> |              |               |              |
|-----------------------------------------|--------------|---------------|--------------|
| <b>Monosaccharide</b>                   | <b>Upper</b> | <b>Middle</b> | <b>Lower</b> |
| Fucose                                  | N.D.         | N.D.          | N.D.         |
| Rhamnose                                | N.D.         | N.D.          | N.D.         |
| Arabinose                               | 12.0         | 12.4          | 12.7         |
| Galactose                               | 3.8          | 4.0           | 5.3          |
| Glucose                                 | 16.6         | 15.8          | 19.2         |
| Xylose                                  | 64.3         | 64.4          | 58.8         |
| Mannose                                 | N.D.         | N.D.          | N.D.         |
| Galacturonic acid                       | 2.6          | 2.4           | 2.9          |
| Glucuronic acid                         | 0.7          | 0.9           | 1.1          |

**Table S2.** Chemical shift assignments of polysaccharides in native sorghum stem internodes.

| Polysaccharide |                                                                                          | Chemical shift (ppm) |      |      |      |      |      | References/notes |
|----------------|------------------------------------------------------------------------------------------|----------------------|------|------|------|------|------|------------------|
| Name           | Type, unit (denotation)                                                                  | C1                   | C2   | C3   | C4   | C5   | C6   |                  |
| Cellulose      | Crystalline, glucose ( <sup>1</sup> C)                                                   | 105.2                | 72.8 | 75.1 | 88.1 | 72.8 | 64.8 | 1-4              |
|                | Crystalline, glucose ( <sup>2</sup> C)                                                   | 105.2                | 72.8 | 75.8 | 89   | 72.6 | 65.4 | 1-4              |
|                | Crystalline, glucose ( <sup>3</sup> C)                                                   | 105.2                | 72.8 | 75.8 | 89.5 | 73   | 65.3 | 1-4              |
|                | Amorphous, glucose ( <sup>1</sup> A)                                                     | 105.2                | 72.8 | 75.1 | 83.8 | 75.1 | 61.8 | 1-4              |
|                | Amorphous, glucose ( <sup>2</sup> A)                                                     | 105.2                | 72.8 | 75.4 | 84.1 | 75.4 | 62.2 | 1-4              |
|                | Amorphous, glucose ( <sup>3</sup> A)                                                     | 105.2                | 72.8 | 75.8 | 84.7 | 75.8 | 62.5 | 1-4              |
| Xylan          | Two-fold screw, xylose ( <sup>2f</sup> Xn)                                               | 105.1                | 72.3 | 75.3 | 82.1 | 64.1 | N/A  | 1-3              |
|                | Three-fold screw, xylose ( <sup>3f</sup> Xn)                                             | 102.5                | 73.7 | 74.7 | 77.3 | 63.8 | N/A  | 1,2              |
|                | Three-fold screw, 3- <i>O</i> -<br>arabinose-substituted xylose<br>( <sup>3f,A</sup> Xn) | 102.5                | 74   | 76.7 | 74.6 | 63.6 | N/A  | 4,5              |
|                | Arabinose (A)                                                                            | 108.4                | 81.8 | 78.2 | 85.6 | 62.4 | N/A  | 1,4,6            |
|                | Glucuronic acid (GlcA)                                                                   | 98.6                 | 72.4 | -    | -    | -    | -    | 6                |
|                | Acetate (AC <sup>CO</sup> , AC <sup>Me</sup> )                                           | 174                  | 21.4 | N/A  | N/A  | N/A  | N/A  | 2                |

**Table S3.** Quantitative  $^{13}\text{C}$  spin-lattice relaxation time ( $T_1$ ) measurements of polysaccharides in sorghum stem cell walls. Data was fitted using a biexponential function,  $I(t) = A\left(1 - 2e^{-\frac{t}{T_{1A}}}\right) +$

$B\left(1 - 2e^{-\frac{t}{T_{1B}}}\right)$ , where  $A = 1 - B$ .

|                    | Chemical shift<br>(ppm) | Fraction of<br>short $T_1$ | Short $T_1$       | Fraction of<br>long $T_1$ | Long $T_1$        |
|--------------------|-------------------------|----------------------------|-------------------|---------------------------|-------------------|
| C1                 | 105.2                   | $0.199 \pm 0.01$           | $0 \pm 0.002$     | $0.862 \pm 0.009$         | $9.151 \pm 0.235$ |
| $^{13}\text{C}6$   | 64.8                    | $0.194 \pm 0.021$          | $0.01 \pm 0.007$  | $0.825 \pm 0.017$         | $7.864 \pm 0.468$ |
| $^{23}\text{C}6$   | 65.4                    | $0.183 \pm 0.021$          | $0.004 \pm 0.005$ | $0.88 \pm 0.017$          | $8.808 \pm 0.486$ |
| $^{1A}\text{C}3/5$ | 75.1                    | $0.208 \pm 0.031$          | $0.035 \pm 0.016$ | $0.734 \pm 0.024$         | $5.118 \pm 0.491$ |
| $^{1A}\text{C}6$   | 61.8                    | $0.535 \pm 0.04$           | $0.193 \pm 0.036$ | $0.394 \pm 0.034$         | $4.089 \pm 0.771$ |
| $^{2A}\text{C}6$   | 62.2                    | $0.51 \pm 0.038$           | $0.189 \pm 0.036$ | $0.419 \pm 0.033$         | $4.459 \pm 0.784$ |
| $^{3f}\text{Xn}2$  | 73.7                    | $0.222 \pm 0.037$          | $0.054 \pm 0.028$ | $0.682 \pm 0.031$         | $3.133 \pm 0.373$ |
| $^{3f}\text{Xn}3$  | 74.7                    | $0.218 \pm 0.034$          | $0.043 \pm 0.022$ | $0.705 \pm 0.027$         | $3.937 \pm 0.428$ |
| $^{3f}\text{Xn}4$  | 77.3                    | $0.24 \pm 0.036$           | $0.036 \pm 0.02$  | $0.664 \pm 0.03$          | $2.531 \pm 0.292$ |
| $^{3f}\text{Xn}5$  | 63.8                    | $0.382 \pm 0.037$          | $0.145 \pm 0.036$ | $0.545 \pm 0.031$         | $4.312 \pm 0.597$ |
| A2                 | 81.8                    | $0.317 \pm 0.039$          | $0.045 \pm 0.024$ | $0.582 \pm 0.032$         | $3.048 \pm 0.452$ |
| A4                 | 85.6                    | $0.445 \pm 0.052$          | $0.148 \pm 0.045$ | $0.505 \pm 0.043$         | $4.412 \pm 0.92$  |

## Supplementary References

1. Terrett, O. M. *et al.* Molecular architecture of softwood revealed by solid-state NMR. *Nat. Commun.* **10**, 4978 (2019).
2. Simmons, T. J. *et al.* Folding of xylan onto cellulose fibrils in plant cell walls revealed by solid-state NMR. *Nat. Commun.* **7**, 13902 (2016).
3. Kang, X. *et al.* Lignin-polysaccharide interactions in plant secondary cell walls revealed by solid-state NMR. *Nat. Commun.* **10**, 347 (2019).
4. Wang, T., Salazar, A., Zabolina, O. A. & Hong, M. Structure and dynamics of *Brachypodium* primary cell wall polysaccharides from two-dimensional <sup>13</sup>C solid-state nuclear magnetic resonance spectroscopy. *Biochemistry* **53**, 2840–2854 (2014).
5. Komatsu, T. & Kikuchi, J. Comprehensive signal assignment of <sup>13</sup>C-labeled lignocellulose using multidimensional solution NMR and <sup>13</sup>C chemical shift comparison with solid-state NMR. *Anal. Chem.* **85**, 8857–8865 (2013).
6. Dick-Pérez, M. *et al.* Structure and interactions of plant cell-wall polysaccharides by two- and three-dimensional magic-angle-spinning solid-state NMR. *Biochemistry* **50**, 989–1000 (2011).
